RESEARCH ARTICLE

# Patterns of multimorbidity in older adults with multiple myeloma: An analysis of SEER-Medicare

Atinuke G. Oyinbo<sup>1\*</sup>, Mayra Tisminetzky<sup>1,2,3</sup>, Jonggyu Baek<sup>4</sup>, Maira A. Castaneda-Avila<sup>1</sup>, Clark DuMontier<sup>5</sup>, Muthalagu Ramanathan<sup>6</sup>, Kate L. Lapane<sup>1</sup>, Mara M. Epstein<sup>2</sup>

**1** Division of Epidemiology, Department of Population and Quantitative Health Sciences, University of Massachusetts Chan Medical School, Worcester, Massachusetts, United States of America, **2** Division of Health Systems Science, Department of Medicine, University of Massachusetts Chan Medical School, Worcester, Massachusetts, United States of America, **3** Division of Geriatric Medicine, Department of Medicine, University of Massachusetts Chan Medical School, Worcester, Massachusetts, United States of America, **4** Division of Biostatistics and Health Services Research, Department of Population and Quantitative Health Sciences, University of Massachusetts Chan Medical School, Worcester, Massachusetts, United States of America, **5** VA Boston Healthcare System and Brigham and Women's Hospital, Boston, Massachusetts, United States of America, **6** Division of Hematology-Oncology, Department of Medicine, UMass Memorial Medical Center, University of Massachusetts Chan Medical School, Worcester, Massachusetts, United States of America

\* [atinuke.oyinbo@umassmed.edu](mailto:atinuke.oyinbo@umassmed.edu)

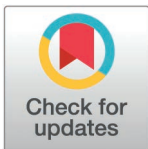

**OPEN ACCESS**

**Citation:** Oyinbo AG, Tisminetzky M, Baek J, Castaneda-Avila MA, DuMontier C, Ramanathan M, et al. (2025) Patterns of multimorbidity in older adults with multiple myeloma: An analysis of SEER-Medicare. PLoS One 20(8): e0330331. <https://doi.org/10.1371/journal.pone.0330331>

**Editor:** Donovan Anthony McGrowder, The University of the West Indies, JAMAICA

**Received:** June 12, 2025

**Accepted:** July 30, 2025

**Published:** August 20, 2025

**Copyright:** © 2025 Oyinbo et al. This is an open access article distributed under the terms of the [Creative Commons Attribution License](https://creativecommons.org/licenses/by/4.0/), which permits unrestricted use, distribution, and reproduction in any medium, provided the original author and source are credited.

**Data availability statement:** SEER-Medicare data is managed by the National Cancer Institute (NCI) and the Centers for Medicare and Medicaid Services (CMS). The data includes de-identified patient- and provider-level health information that is highly sensitive

## Abstract

### Objective

Multimorbidity influences the management of symptoms, treatment, and health outcomes for older adults with multiple myeloma. Our study characterized patient profiles defined by discrete chronic condition patterns and examined the distribution of their sociodemographic factors in older adults at time of diagnosis with multiple myeloma.

### Methods

Using the Surveillance, Epidemiology and End Results (SEER) Program database linked with Medicare insurance claims (2007–2017), we examined 11,926 individuals diagnosed with multiple myeloma at age ≥ 65 years. Hierarchical cluster analysis was conducted to identify prevalent patterns of multimorbidity from thirty-three chronic conditions, and sociodemographic factors associated with the identified patterns were examined.

### Results

The median age of the cohort was 77 years and 48% were women. Three patient groups with distinct patterns of multimorbidity were identified: minimal multimorbidity featuring minor burden of comorbid conditions (54.3%), psychiatric and musculoskeletal multimorbidity (21.5%), and a high multimorbidity group featuring cardiometabolic

due to the possible risk of re-identification. As such, the data cannot be shared publicly for replicability studies. Research investigators interested in this data may obtain access by directly contacting the NCI and obtaining a data use agreement, subject to approvals. Data can be requested from <https://healthcaresdelivery.cancer.gov/seermedicare/obtain/requests.html>.

**Funding:** This work was supported by the United States Department of Veterans Affairs (VA) Career Development Award (grant number IK2BX005280) provided to Clark DuMontier.

**Competing interests:** The authors have declared that no competing interests exist.

and multiple system disorders (20.7%). The remaining 3.5% did not have multimorbidity. Patients in the cardiometabolic and multisystem multimorbidity pattern were the oldest, more likely to reside in geographic areas with high poverty levels and comprised more men and Hispanic individuals than the other two patterns. The psychiatric and musculoskeletal multimorbidity pattern comprised the largest proportion of women and lowest proportion of non-Hispanic Black individuals. Those with relatively minimal multimorbidity burden were the most likely to be married.

## Conclusions

Identifying patterns of multimorbidity in older adults newly diagnosed with multiple myeloma provides insight into the burden and clustering tendency of chronic conditions within similar patient groups. Our findings can inform tailored disease management and treatment programs that take these unique multimorbidity profiles into account.

## Introduction

Multiple myeloma accounts for 19% of new hematologic cancer cases in the United States [1]. Newly affecting over 35,780 individuals in 2024 [1], multiple myeloma is diagnosed via biomarker parameters (SLiM criteria) [2], and features of end-organ damage including hypercalcemia, renal insufficiency, anemia, and lytic bone lesions (CRAB criteria) [3]. While the incidence of multiple myeloma has risen over the past few decades, the 5-year relative survival rates have also steadily increased due to the availability of improved and novel treatment methods [4]. The majority of patients diagnosed with this condition are older adults, with a median age at diagnosis of 69 years, and two-thirds of all diagnoses occurring in adults aged  $\geq 65$  years [5]. Multimorbidity (defined as two or more coexisting chronic conditions) [6] is commonly experienced by adults aged  $\geq 65$  years [7]. Forty to sixty percent of people with multiple myeloma are affected by other chronic health conditions [8–10]. In individuals with multiple myeloma, multimorbidity is a significant predictor of poor survival [9,10] and is linked to functional status decline, poor quality of life, and treatment toxicities [11–14]. Understanding the underlying patterns of multimorbidity in this population is key to understanding how unique patterns of chronic conditions affect the prognosis and treatment trajectory of patients with multiple myeloma.

Multimorbidity is often measured using counts of chronic conditions or with indices specific to the diagnostic criteria of multiple myeloma [8,15–17]. Count-based methods may not account for the complex manifestation of multiple chronic conditions [18,19] and mainstream comorbidity indices may be limited in their ability to granularly examine multimorbidity in older adults [20], as they include a limited number of chronic conditions and may be designed to predict specific outcomes. The need for multimorbidity assessments that go beyond the prognostic significance of myeloma-related chronic diseases is crucial, given that the prevalence of multimorbidity increases with age and older adults with multiple myeloma are likely living

with comorbid diagnoses beyond those directly related to the cancer. The presence of specific comorbid conditions, in addition to the total burden of multimorbidity, may further complicate and adversely impact cancer treatment selection and prognosis.

To date, one study has examined multimorbidity in older US veterans with multiple myeloma using latent class analysis [21], although this research has not been replicated in more broadly generalizable populations. Another study investigated multimorbidity patterns in older adults with monoclonal gammopathy of undetermined significance (MGUS), which is a precursor to multiple myeloma [22]. There is minimal evidence to suggest which subgroups are more likely to experience certain chronic condition groupings within the general US population of patients with multiple myeloma. The aim of this study was to identify patterns of multimorbidity prevalent upon multiple myeloma diagnosis in older adults using hierarchical cluster analysis. This study also examines the association between patient characteristics and identified multimorbidity patterns.

## Materials and methods

### Data source

The Surveillance, Epidemiology, and End Results Program data linked with Medicare claims (SEER-Medicare) consists of population-based data from cancer registries covering 48% of the US population, linked to patient-level Medicare enrollment and claims information for Medicare fee-for-service beneficiaries [23,24]. Medicare is the federal health insurance program for individuals aged 65 or older in the US. All eligible older adults are automatically enrolled into the program, which provides access to inpatient services, outpatient care, and drug prescriptions. These healthcare encounters are documented as medical claims for reimbursement to providers [25]. Over 95% of individuals aged  $\geq 65$  years who are included in SEER have been linked to Medicare enrollment data [26]. This database includes healthcare services, demographics, cancer-specific information, and chronic conditions for Medicare-insured older adults diagnosed with cancer. The University of Massachusetts Chan Medical School Institutional Review Board (IRB) approved this study (IRB number H00022359). The SEER-Medicare data are deidentified, and were first accessed 8th February 2021.

### Study population

The inclusion criteria comprised individuals who were: (1) newly diagnosed between 2007 and 2017 with multiple myeloma determined via histology code, (2) aged  $\geq 65$  years at time of diagnosis, (3) and continuously enrolled in Medicare fee-for-service for 12 months before diagnosis. Participants were excluded if they had prior cancer diagnoses, or if their multiple myeloma diagnosis was ascertained from autopsy or death certificate. The enrollment criteria were applied to ensure enough time prior to the cancer diagnosis to determine baseline chronic conditions.

### Study variables

**Co-morbid chronic conditions.** The presence of chronic conditions at time of multiple myeloma diagnosis was determined using non-cancer chronic condition flags defined using validated algorithms in the Centers for Medicare & Medicaid Services (CMS) Chronic Conditions Data Warehouse (CCW). The operational definitions of non-cancer chronic conditions were specifically designed to identify these conditions using Medicare claims data [27]. The list of conditions used in this study included anemia, chronic kidney disease, liver disease, cardiovascular (acute myocardial infarction, atrial fibrillation, congestive heart failure, hypertension, ischemic heart disease, peripheral vascular disease, and stroke), metabolic (acquired hypothyroidism, diabetes, hyperlipidemia, and obesity), neurological and psychiatric (Alzheimer's disease and related disorders or senile dementia, anxiety, depressive disorders, epilepsy, and schizophrenia and other psychotic disorders), respiratory (asthma and chronic obstructive pulmonary disease), musculoskeletal and pain-related (fibromyalgia, hip/pelvic fracture, mobility impairment, osteoporosis, rheumatoid arthritis/osteoarthritis, and spinal injury), sensory (glaucoma, cataract, and deafness or hearing impairment), substance use (drug use and tobacco use disorders),

and skin conditions (pressure ulcers). The CCW algorithms search for condition-specific claims criteria within a 1, 2 or 3-year look back time period before a given index year and flags that condition as being present during that index year [27]. We searched for chronic condition flags in the year before and the year of the diagnosis of multiple myeloma to satisfy the criterion of an individual having that chronic condition at diagnostic baseline. Patients who did not have sufficient Medicare coverage during the lookback period were excluded, as gaps in coverage do not allow for accurate capture of pre-existing chronic conditions [28]. Patients were considered to have multimorbidity at the time of diagnosis with multiple myeloma if two or more chronic conditions were flagged according to the CCW algorithms.

**Demographic information.** From the SEER-Medicare database, we identified information on patients' sex, age at multiple myeloma diagnosis, race and ethnicity, marital status at diagnosis, area of residence and percent of residents living below the federal poverty line in patients' residential area based on census tract. All of these variables were extracted from cancer registry data and were selected for their established associations with various patterns of multimorbidity in older adult populations [29].

### Statistical analysis

We used an agglomerative hierarchical cluster analysis (HCA) to identify distinct groups of patients based on similar sets of comorbid chronic health conditions. This method is appropriate for when the cutoff point for the number of clusters is determined subjectively [30]. Conditions with a prevalence  $\geq 2\%$  in the cohort were applied to the HCA [31], and 33 CCW conditions met this threshold. The HCA assigns individuals to clusters based on the similarity of their profiles of chronic conditions, via a clustering algorithm. The similarity between chronic conditions was measured using the Jaccard coefficient, which is an appropriate metric for clinical conditions, as it focuses only on conditions that two individuals have in common while disregarding conditions that are present in neither person [32]. The data were randomly split into two datasets with the same sample size (training and validation), and we ran the Ward clustering algorithm [33] on both separately using the *'hclust'* package in R (version 4.4.0). The optimal number of multimorbidity clusters was determined by both qualitatively consulting clinicians and quantitatively examining an exhaustive list of statistical indices that deduce the best clustering solution using the *'NbClust'* package from R [34]. Results from the HCA were output into a dendrogram from which the clusters were then extracted. As cluster membership was similar between the training and validation datasets, we used the Ward method for the entire study sample to improve the efficiency of the estimates.

To describe and define the conditions most characteristic of each given pattern of multimorbidity, we considered conditions with the highest observed/expected [O/E] ratios (disease prevalence in the cluster divided by disease prevalence in the entire cohort) and exclusivity (number of patients with the condition in the cluster divided by total number of patients with the condition). The O/E ratio helps highlight conditions that are overrepresented within a cluster, denoting a higher prevalence than what would be expected by chance in the study population. Exclusivity underlines which conditions uniquely characterize any given cluster compared to others. A chronic condition was deemed relevant to a given cluster based on an O/E ratio  $> 1$  and exclusivity of  $> 25\%$  [35–37]. Confidence intervals were derived for the O/E ratios [38]. We described the prevalence of the defining chronic conditions within each cluster and described the multimorbidity patterns by cohort characteristics. Associations between each multimorbidity pattern and demographic factors were examined using chi-square tests and the Brown-Mood median test. A sensitivity analysis was conducted by comparing results from using the Ward algorithm to that of the flexible beta algorithm. SAS version 9.4 (SAS Institute Inc., Cary, NC, USA) was used jointly with R version 4.4.0 to complete all analyses.

## Results

### Study population

There were 11,926 eligible Medicare beneficiaries in the study cohort (Fig 1). The median age at diagnosis for patients was 77 years (Interquartile range [IQR]: 72–82 years) and 48% were women. The cohort consisted of 13.7% non-Hispanic

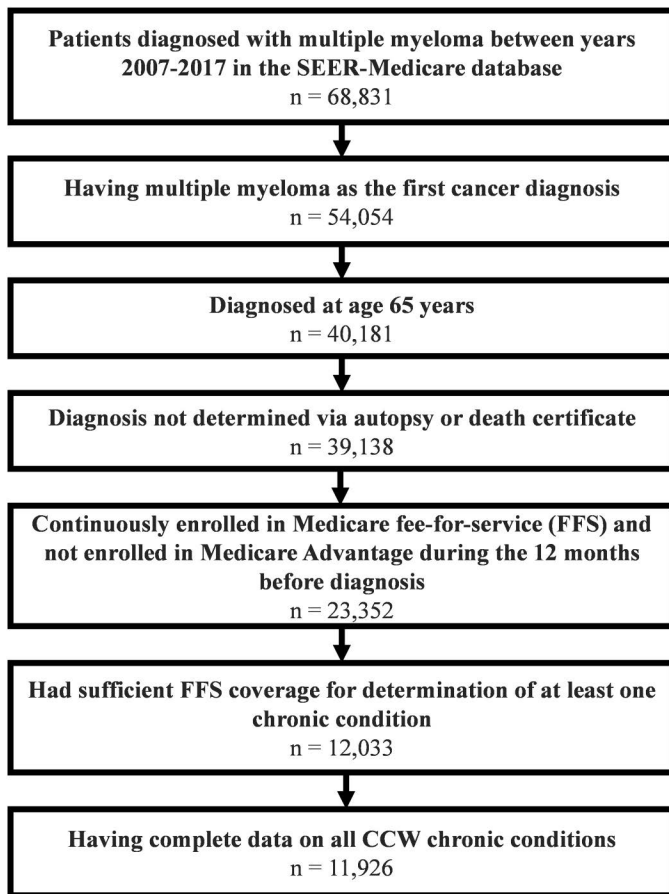

**Fig 1. Study sample selection flowchart.**

<https://doi.org/10.1371/journal.pone.0330331.g001>

Black individuals, as well as 6.2% Hispanic, 76.1% Non-Hispanic White, and 3.9% Non-Hispanic Asian or Pacific Islander and American Indian/Alaska Native individuals (Table 1). Nearly all (96.5%) had multimorbidity (Table 2).

### Multimorbidity patterns

Three clusters of patients were separated based on the patterns of their baseline chronic health conditions (Table 3). We determined the three-cluster solution as optimal guided by explorations of different statistical clustering solutions and clinician feedback (see S1 Text). S2 Table shows proportions, O/E ratios and exclusivity for all the chronic conditions in each cluster, while Table 3 summarizes this information for the conditions with the highest of these values. The first cluster (54.3% of entire study cohort) comprised patients with high O/E ratios and exclusivity for only obesity, glaucoma, tobacco use disorder and liver disease. In this cluster, the prevalence of all other conditions was comparable to that observed in the general study cohort. We labeled this cluster relatively minimal multimorbidity to accurately reflect its distribution and enhance interpretability. The second cluster (21.5%) consisted of persons with patterns of psychiatric, pain-related and musculoskeletal conditions including anxiety, osteoporosis, depressive disorders, fibromyalgia, and fractures, as well as drug use disorder. The third cluster (20.7%) included individuals with a high multimorbidity burden featuring primarily cardiovascular conditions, and a wide array of respiratory, endocrine, and organ-specific conditions (Fig 2). The prevalence of anemia was high across all the patterns (84%–94%). Results obtained using the flexible beta algorithm were similar (S3 Table).

**Table 1. Distribution of sociodemographic characteristics according to multimorbidity patterns identified among 11,926 older adults diagnosed with multiple myeloma in the SEER-Medicare database, 2007–2017.**

| Patient characteristics (column %)             | Total population (n = 11,926) | ≤ One chronic condition (n = 415) | Relatively minimal (n = 6,481) | Psychiatric and musculoskeletal (n = 2,563) | Cardiovascular and multisystem (n = 2,467) | P      |
|------------------------------------------------|-------------------------------|-----------------------------------|--------------------------------|---------------------------------------------|--------------------------------------------|--------|
| Median age at diagnosis (IQR)                  | 77 (72–82)                    | 74 (70–79)                        | 76 (71–82)                     | 76 (71–82)                                  | 79 (74–84)                                 | <.0001 |
| Women                                          | 48.2                          | 28.7                              | 45.1                           | 65.4                                        | 41.9                                       | <.0001 |
| <b>Race/ethnicity<sup>†</sup></b>              |                               |                                   |                                |                                             |                                            | <.0001 |
| Hispanic                                       | 6.2                           | 5.9                               | 6.4                            | 5.2                                         | 6.9                                        |        |
| Non-Hispanic White                             | 76.1                          | 77.0                              | 73.9                           | 83.6                                        | 74.1                                       |        |
| Non-Hispanic Black                             | 13.7                          | 14.4                              | 15.4                           | 8.1                                         | 15.1                                       |        |
| Non-Hispanic API, AI/AN                        | 3.9                           | 2.7                               | 4.3                            | 3.1                                         | 3.9                                        |        |
| <b>Marital status at diagnosis</b>             |                               |                                   |                                |                                             |                                            | <.0001 |
| Single (never married)                         | 5.8                           | 6.3                               | 5.6                            | 6.1                                         | 5.8                                        |        |
| Married/Partnered                              | 38.1                          | 40.7                              | 40.2                           | 35.9                                        | 34.6                                       |        |
| Separated/Divorced                             | 5.4                           | 7.7                               | 5.3                            | 5.3                                         | 5.5                                        |        |
| Widowed                                        | 17.6                          | 10.1                              | 16.0                           | 20.4                                        | 20.1                                       |        |
| Unknown marital status                         | 33.1                          | 35.2                              | 32.9                           | 32.2                                        | 34.0                                       |        |
| <b>Census tract location<sup>†</sup></b>       |                               |                                   |                                |                                             |                                            | 0.02   |
| Metropolitan                                   | 86.1                          | 83.7                              | 86.7                           | 86.3                                        | 85.3                                       |        |
| Urban/Rural                                    | 13.9                          | 16.1                              | 14.0                           | 15.0                                        | 12.2                                       |        |
| <b>Census tract poverty level<sup>††</sup></b> |                               |                                   |                                |                                             |                                            | 0.01   |
| 0%–<5% poverty                                 | 23.3                          | 23.4                              | 22.9                           | 24.0                                        | 23.6                                       |        |
| 5%–<10% poverty                                | 25.5                          | 26.3                              | 26.0                           | 25.6                                        | 24.2                                       |        |
| 10%–<20% poverty                               | 25.9                          | 25.3                              | 26.1                           | 25.8                                        | 25.5                                       |        |
| 20%–100% poverty                               | 18.6                          | 17.3                              | 18.5                           | 16.7                                        | 21.0                                       |        |
| Unknown poverty level                          | 6.7                           | 7.7                               | 6.4                            | 7.9                                         | 5.7                                        |        |

**Notes.** IQR: Interquartile Range, API, AI/AN: Asian or Pacific Islander, American Indian/Alaska Native.

<sup>†</sup> Missing data for race/ethnicity = 78, and missing data for location = 5. <sup>††</sup>

<https://doi.org/10.1371/journal.pone.0330331.t001>

## Demographic characteristics of multimorbidity patterns

Patients in the cardiometabolic and multisystem multimorbidity pattern were the oldest group at the time of multiple myeloma diagnosis (median age, 79 years), and were more likely to live in the highest poverty census tract (21%) compared to other groups (Table 1). Relative to the two other patterns, this pattern also included a greater proportion of Hispanic individuals (6.9%) and men (58.1%). The psychiatric and musculoskeletal multimorbidity pattern comprised the largest proportion of women (56%) and non-Hispanic White (80.2%), and the lowest proportion of non-Hispanic Black individuals (10.6%) compared to the other two patterns. Those with relatively minimal multimorbidity were the most likely to be married.

## Discussion

This study identified three multimorbidity patterns in an older adult population of Medicare beneficiaries with newly diagnosed multiple myeloma: 1) relatively minimal multimorbidity featuring minor burden of most comorbid conditions; 2) psychiatric and musculoskeletal multimorbidity; and 3) cardiometabolic and multisystem multimorbidity. Women were overrepresented in the psychiatric and musculoskeletal multimorbidity pattern, and people with low socioeconomic resources were overrepresented in the cardiometabolic and multisystem multimorbidity pattern. By classifying patterns

**Table 2. Prevalence of thirty-three chronic conditions in older adults with multiple myeloma at diagnosis, as defined by the chronic conditions data warehouse.**

| Condition group                                    | %    |
|----------------------------------------------------|------|
| <b>Cardiovascular conditions</b>                   |      |
| Acute myocardial infarction                        | 2.7  |
| Atrial fibrillation                                | 17.7 |
| Congestive heart failure                           | 36.6 |
| Hypertension                                       | 81.1 |
| Ischemic heart disease                             | 48.2 |
| Peripheral vascular disease                        | 18.3 |
| Stroke                                             | 7.4  |
| <b>Metabolic conditions</b>                        |      |
| Acquired hypothyroidism                            | 19.3 |
| Diabetes                                           | 35.2 |
| Hyperlipidemia                                     | 57.9 |
| Obesity                                            | 10.4 |
| <b>Neurological and psychiatric conditions</b>     |      |
| Alzheimer's disease and related dementias          | 15.5 |
| Anxiety                                            | 13.2 |
| Depressive disorder                                | 21.3 |
| Epilepsy                                           | 2.1  |
| Schizophrenia and other psychotic disorders        | 3.8  |
| <b>Respiratory conditions</b>                      |      |
| Asthma                                             | 7.4  |
| Chronic obstructive pulmonary disease              | 19.2 |
| <b>Musculoskeletal and pain-related conditions</b> |      |
| Fibromyalgia                                       | 21.7 |
| Hip/Pelvic fracture                                | 3.8  |
| Mobility impairments                               | 4.6  |
| Osteoporosis                                       | 17.4 |
| Rheumatoid arthritis/osteoarthritis                | 47.9 |
| Spinal injury                                      | 2.3  |
| <b>Hematologic, kidney, and liver conditions</b>   |      |
| Anemia                                             | 84.7 |
| Chronic kidney disease                             | 54.1 |
| Liver disease                                      | 7.2  |
| <b>Sensory conditions</b>                          |      |
| Cataract                                           | 21.1 |
| Glaucoma                                           | 12.1 |
| Deafness                                           | 6.9  |
| <b>Substance use conditions</b>                    |      |
| Drug use disorders                                 | 2.3  |
| Tobacco use disorders                              | 6.2  |
| <b>Skin conditions</b>                             |      |
| Pressure ulcers                                    | 9.9  |

**Notes.** Individuals can appear more than once as the conditions are not mutually exclusive. There were 3.5% of patients who did not have a chronic health condition.

<https://doi.org/10.1371/journal.pone.0330331.t002>

**Table 3. Results from hierarchical cluster analysis identifying patterns of multimorbidity and defining conditions among older adults at time of diagnosis with multiple myeloma.**

| Multimorbidity pattern                                          | Defining chronic conditions                 | Count | Prevalence (%) | O/E Ratio | Exclusivity (%) | O/E Ratio 95% CI |
|-----------------------------------------------------------------|---------------------------------------------|-------|----------------|-----------|-----------------|------------------|
| <b>Relatively minimal multimorbidity (n=6,481)</b>              | Obesity                                     | 806   | 12.4           | 1.15      | 65.0            | 1.08–1.24        |
|                                                                 | Glaucoma                                    | 924   | 14.3           | 1.14      | 64.4            | 1.07–1.22        |
|                                                                 | Tobacco use disorders                       | 463   | 7.1            | 1.12      | 63.1            | 1.02–1.23        |
|                                                                 | Liver disease                               | 535   | 8.3            | 1.10      | 62.1            | 1.01–1.20        |
| <b>Psychiatric and musculoskeletal multimorbidity (n=2,563)</b> | Anxiety                                     | 894   | 34.9           | 2.55      | 56.7            | 2.38–2.72        |
|                                                                 | Osteoporosis                                | 924   | 36.1           | 2.01      | 44.7            | 1.88–2.14        |
|                                                                 | Depressive disorders                        | 1099  | 42.9           | 1.94      | 43.2            | 1.83–2.06        |
|                                                                 | Drug use disorders                          | 106   | 4.1            | 1.72      | 38.4            | 1.41–2.09        |
|                                                                 | Spinal injury                               | 88    | 3.4            | 1.48      | 33.0            | 1.19–1.82        |
|                                                                 | Schizophrenia and other psychotic disorders | 138   | 5.4            | 1.36      | 30.3            | 1.14–1.61        |
|                                                                 | Hip/Pelvic fracture                         | 138   | 5.4            | 1.36      | 30.2            | 1.14–1.60        |
|                                                                 | Fibromyalgia                                | 772   | 30.1           | 1.34      | 29.9            | 1.25–1.44        |
|                                                                 | Rheumatoid arthritis                        | 1671  | 65.2           | 1.32      | 29.3            | 1.25–1.38        |
|                                                                 | Cataract                                    | 710   | 27.7           | 1.28      | 28.5            | 1.19–1.38        |
| <b>Cardiometabolic and multisystem multimorbidity (n=2,467)</b> | Acute myocardial infarction                 | 201   | 8.1            | 2.93      | 62.8            | 2.54–3.37        |
|                                                                 | Atrial fibrillation                         | 1152  | 46.7           | 2.56      | 54.8            | 2.41–2.71        |
|                                                                 | Pressure ulcers                             | 567   | 23.0           | 2.23      | 47.7            | 2.05–2.42        |
|                                                                 | Stroke                                      | 406   | 16.5           | 2.15      | 46.1            | 1.95–2.37        |
|                                                                 | Congestive heart failure                    | 1951  | 79.1           | 2.09      | 44.7            | 1.99–2.18        |
|                                                                 | Mobility impairments                        | 228   | 9.2            | 1.93      | 41.5            | 1.69–2.20        |
|                                                                 | Peripheral vascular disease                 | 861   | 34.9           | 1.84      | 39.5            | 1.72–1.97        |
|                                                                 | Alzheimer's disease and related dementias   | 686   | 27.8           | 1.74      | 37.2            | 1.61–1.87        |
|                                                                 | Schizophrenia and other psychotic disorders | 168   | 6.8            | 1.72      | 36.9            | 1.47–2.00        |
|                                                                 | Ischemic heart disease                      | 2036  | 82.5           | 1.66      | 35.5            | 1.58–1.73        |
|                                                                 | Diabetes                                    | 1438  | 58.3           | 1.60      | 34.3            | 1.52–1.69        |
|                                                                 | Epilepsy                                    | 81    | 3.3            | 1.50      | 32.1            | 1.19–1.86        |
|                                                                 | Chronic kidney disease                      | 1938  | 78.6           | 1.40      | 30.0            | 1.34–1.47        |
|                                                                 | Depressive disorders                        | 709   | 28.7           | 1.30      | 27.9            | 1.21–1.40        |
|                                                                 | Acquired hypothyroidism                     | 631   | 25.6           | 1.28      | 27.4            | 1.18–1.38        |
|                                                                 | Chronic obstructive pulmonary disease       | 604   | 24.5           | 1.23      | 26.5            | 1.14–1.34        |
|                                                                 | Hip/Pelvic fracture                         | 120   | 4.9            | 1.23      | 26.3            | 1.02–1.47        |
|                                                                 | Hyperlipidemia                              | 1727  | 70.0           | 1.17      | 25.0            | 1.11–1.22        |

**Notes.** O/E Ratio: observed/expected ratio, CI: confidence interval. Defining conditions presented in this table were selected based on an O/E Ratio > 1, exclusivity > 25% and 95% CI that excludes the null. O/E ratios were calculated by dividing the prevalence of the condition in the cluster by the prevalence in the overall cohort. Exclusivity was calculated by dividing the number of patients with the condition in the cluster by the total number of individuals with the condition.

<https://doi.org/10.1371/journal.pone.0330331.t003>

of multimorbidity, we can assess the co-occurrence and burden of specific chronic health conditions that may impact a patient's health beyond their cancer.

It is important to determine cancer patients' complete health status to ensure that cancer management and treatment practices will not conflict with those of other chronic conditions. Our data-driven approach provides a clear visualization of the types of chronic conditions that consistently group together in this patient cohort. In this patient population, nearly all individuals had at least two conditions at time of diagnosis. This saturation of the currently accepted definition

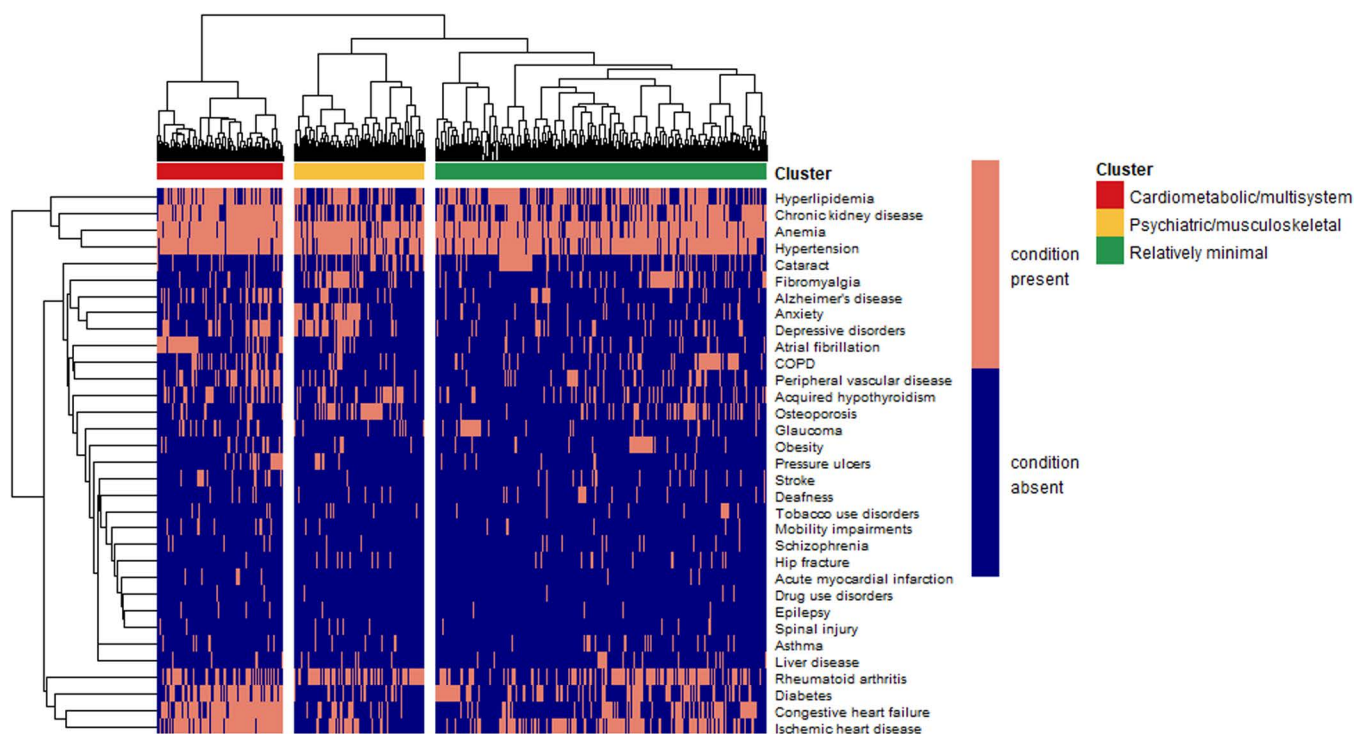

**Fig 2. Heatmap diagram of multimorbidity patterns identified in older adults diagnosed with multiple myeloma, SEER-Medicare 2007–2017.** Columns represent patients and rows represent chronic conditions. Green block: minimal multimorbidity; Yellow block: psychiatric and musculoskeletal multimorbidity; Red block: cardiometabolic and multisystem multimorbidity. In the heatmap, the presence of a chronic condition is indicated with light red, while the absence of that condition is indicated by dark blue. COPD; chronic obstructive pulmonary disease.

<https://doi.org/10.1371/journal.pone.0330331.g002>

of multimorbidity is expected, given the older adult study population. Beyond counting the number of chronic conditions, different approaches are needed to better define and understand the nature and impact of multiple chronic conditions.

Making treatment decisions that account for the complexity of having multiple chronic conditions is often challenging. The clinical guidelines for multiple myeloma recommend that having no comorbidities and being <70 years old qualifies patients to receive the standard of care drug therapies followed by stem cell transplant [39]. This potentially reduces access to standard therapies for large portions of patients since multimorbidity is a prevailing health problem in older adults. As individuals with multimorbidity are not often included in clinical trials [40], guidelines for patients with specific combinations of chronic conditions are not available. Considering that various treatments for multiple myeloma cause toxic side effects [41], the challenge of deciding on optimum treatment modalities for patients with multimorbidity remains. Developing treatment protocols and clinical trials that account for patient multimorbidity starts with identifying common multimorbidity patterns in generalizable cohorts of older adults. Such knowledge can aid in further exploration of how multimorbidity may be associated with treatment choice, targeting treatment options for patients with certain chronic conditions and lastly, improving long-term health outcomes for older individuals with multiple myeloma.

Despite analytic variations, the multimorbidity patterns observed in the present study are similar to those reported in other studies of older adults [42] and specifically with multiple myeloma [21]. The prevalent patterns of multimorbidity identified in the study of US veterans using latent class methods, included cardiovascular and metabolic disease, psychiatric and substance use disorders, chronic lung disease, and multisystem impairment [21]. In a systematic literature review examining patterns of multimorbidity in cancer survivors, cardiometabolic patterns and the clustering of mental health conditions with musculoskeletal disorders have been observed as well [43].

The highest percentage of patients in our study belonged to the minimal multimorbidity pattern, marked by the low prevalence of most chronic conditions. In studies that use similar data-driven methods to partition chronic conditions in older adults, clusters reflective of individuals with low multimorbidity have emerged [21,44]. The predominance of obesity and tobacco use disorder in this pattern may point to their roles as risk factors for various chronic diseases. Interestingly, ocular comorbidities such as glaucoma observed in the pattern have been previously documented in patients with multiple myeloma, and may relate to the deposition of monoclonal proteins in the eye lens [45].

The second most prevalent pattern was highlighted by the presence of concurrent psychiatric, musculoskeletal, and pain-related conditions. The co-occurrence of mental and pain-related disorders in older adults has been extensively documented in the literature [46]. This includes prior findings where mental disorders are their own standalone multimorbidity pattern in patients with multiple myeloma treated at the VA [21], and cases where these conditions cluster with musculoskeletal and pain-related disorders in other populations [47]. These combinations of conditions potentially share complex biological pathways as they have similar neural mechanisms [48]. The majority of individuals within this group were women, and scientific literature suggests that women experience and report more of these conditions compared to men [49]. This multimorbidity pattern represents a patient group that may have difficulty in completing treatment and management plans due to experiencing functional limitations and mental health issues, and that may be at risk for worse health outcomes [50].

The third most common multimorbidity pattern was characterized by high multimorbidity featuring cardiovascular, endocrine, respiratory, and other systemic impairments. This pattern included the highest proportion of people living in an area with poverty levels  $\geq 20\%$ , which is consistent with research that shows associations between poverty and multimorbidity [29]. The study of older US veterans with multiple myeloma, which identified patterns using latent class analysis, identified a similar pattern featuring cardiovascular and metabolic conditions, as well as a separate multisystem impairment pattern defined by conditions impacting various body systems [21]. In other investigations of multimorbidity patterns in older adults, conditions affecting the cardiovascular and endocrine systems tend to cluster together as well [42]. The conditions clustered within this group are also reflective of those that are highly prevalent in nursing home residents [51]. This pattern reflects a patient subgroup that experiences an overwhelmingly high burden of serious chronic health conditions that may likely impact cancer prognosis and the overall health care decision-making process. Future research should explore this subgroup to determine their healthcare utilization, treatment modalities, and health outcomes.

### Strengths and limitations

This study is the first to our knowledge that explored patterns of multimorbidity in a population-based sample of older adult Medicare beneficiaries diagnosed with multiple myeloma and examined how these patterns differ according to select patient characteristics. The study offers a large sample size and is sufficiently powered to observe accurate estimates in the patient cohort. Our findings are generalizable to adults aged  $\geq 65$  years with newly diagnosed multiple myeloma in the US with fee-for-service Medicare, an age group that makes up two-thirds [5] of all newly diagnosed cases. The findings should be interpreted in the context of a few limitations. It is unknown whether examining individuals with other forms of Medicare, including Medicare Advantage, may produce similar results. While the CCW algorithms have been validated, some have the potential for misclassifying conditions that do not require frequent health care utilization [52]. Although the claims-based diagnosis codes cannot be verified using other data sources, this misclassification is likely non-differential with regard to myeloma status. Further, the identified multimorbidity patterns are in agreement with existing literature and studies using different approaches, so the potential for differential misclassification is low. The HCA method is exploratory and may produce different results depending on which clustering algorithms are used. However, we observed comparable results upon applying a different clustering algorithm. In addition to variations in adopted methods, the chronic disease compositions of the multimorbidity patterns may also differ due to

the underlying study population, data sources and structures, and the specific chronic conditions that serve as the input for the partitioning method [53]. Nevertheless, most findings from this study (specifically the multimorbidity patterns we observed) are in agreement with previous research [21,42].

## Conclusions

In summary, patterns of multimorbidity identified among a population-based sample of Medicare beneficiaries diagnosed with multiple myeloma were similar to those identified in other older adult population settings, including those with multiple myeloma and other cancers. Cardio-metabolic, musculoskeletal and psychiatric conditions are three major patterns of multimorbidity frequently observed in these populations [42]. Our study offers further insights on sociodemographic factors associated with these patterns, in addition to confirming that these patterns are replicated in a generalizable population of older adults with multiple myeloma. In particular, our study has further highlighted the co-occurrence of psychiatric conditions with musculoskeletal disorders in this patient population, as well as observed a group with minimal multimorbidity. Our results may help clinicians be cognizant of certain patient groups that may be more likely to present with certain patterns of conditions to promote greater attention to their unique care needs and how this may influence treatment choice, response, and prognosis. The findings from this study also provide insights for future studies that could explore tailoring treatment recommendations informed by baseline conditions in older adults newly diagnosed with multiple myeloma to improve patient outcomes.

## Supporting information

**S1 Table. Modifications made to the chronic conditions in the Centers for Medicare and Medicaid Services Chronic Conditions Data Warehouse.**

(DOCX)

**S2 Table. Prevalence, observed/expected ratios and exclusivity of all chronic conditions per multimorbidity pattern derived from the hierarchical cluster analysis using the Ward algorithm.**

(DOCX)

**S3 Table. Prevalence, observed/expected ratios and exclusivity of all chronic conditions per multimorbidity pattern derived from the hierarchical cluster analysis using the flexible beta algorithm set to  $-0.5$ .**

(DOCX)

**S1 Text. Supplemental technical appendix.**

(DOCX)

## Acknowledgments

This study used the linked SEER-Medicare database. The interpretation and reporting of these data are the sole responsibility of the authors. The authors acknowledge the efforts of the National Cancer Institute; Information Management Services (IMS), Inc.; and the Surveillance, Epidemiology, and End Results (SEER) Program tumor registries in the creation of the SEER-Medicare database. The collection of cancer incidence data used in this study was supported by the California Department of Public Health pursuant to California Health and Safety Code Section 103885; Centers for Disease Control and Prevention's (CDC) National Program of Cancer Registries, under cooperative agreement 1NU58DP007156; the National Cancer Institute's Surveillance, Epidemiology and End Results Program under contract HHSN2612018000321 awarded to the University of California, San Francisco, contract HHSN2612018000151 awarded to the University of Southern California, and contract HHSN2612018000091 awarded to the Public Health Institute. The ideas and opinions expressed herein are those of the author(s) and do not necessarily reflect the opinions of the State of California,

Department of Public Health, the National Cancer Institute, and the Centers for Disease Control and Prevention or their Contractors and Subcontractors.

## Author contributions

**Conceptualization:** Atinuke G. Oyinbo, Kate L. Lapane, Mara M. Epstein.

**Formal analysis:** Atinuke G. Oyinbo, Jonggyu Baek, Mara M. Epstein.

**Investigation:** Atinuke G. Oyinbo, Mayra Tisminetzky, Jonggyu Baek, Maira A. Castaneda-Avila, Clark DuMontier, Muthalagu Ramanathan, Kate L. Lapane, Mara M. Epstein.

**Methodology:** Atinuke G. Oyinbo, Mayra Tisminetzky, Jonggyu Baek, Maira A. Castaneda-Avila, Clark DuMontier, Muthalagu Ramanathan, Kate L. Lapane, Mara M. Epstein.

**Resources:** Kate L. Lapane.

**Supervision:** Kate L. Lapane, Mara M. Epstein.

**Validation:** Mayra Tisminetzky, Jonggyu Baek, Maira A. Castaneda-Avila, Clark DuMontier, Muthalagu Ramanathan, Kate L. Lapane, Mara M. Epstein.

**Visualization:** Atinuke G. Oyinbo, Jonggyu Baek.

**Writing – original draft:** Atinuke G. Oyinbo, Mara M. Epstein.

**Writing – review & editing:** Atinuke G. Oyinbo, Mayra Tisminetzky, Jonggyu Baek, Maira A. Castaneda-Avila, Clark DuMontier, Muthalagu Ramanathan, Kate L. Lapane, Mara M. Epstein.

## References

1. Siegel RL, Giaquinto AN, Jemal A. Cancer statistics, 2024. *CA Cancer J Clin.* 2024;74(1):12–49. <https://doi.org/10.3322/caac.21820> PMID: [38230766](https://pubmed.ncbi.nlm.nih.gov/38230766/)
2. Ludwig H, Kainz S, Schreder M, Zojer N, Hinke A. SLiM CRAB criteria revisited: temporal trends in prognosis of patients with smoldering multiple myeloma who meet the definition of 'biomarker-defined early multiple myeloma' - a systematic review with meta-analysis. *EClinicalMedicine.* 2023;58:101910. <https://doi.org/10.1016/j.eclinm.2023.101910> PMID: [36969337](https://pubmed.ncbi.nlm.nih.gov/36969337/)
3. Rajkumar SV, Dimopoulos MA, Palumbo A, Blade J, Merlini G, Mateos M-V, et al. International Myeloma Working Group updated criteria for the diagnosis of multiple myeloma. *Lancet Oncol.* 2014;15(12):e538–48. [https://doi.org/10.1016/S1470-2045\(14\)70442-5](https://doi.org/10.1016/S1470-2045(14)70442-5) PMID: [25439696](https://pubmed.ncbi.nlm.nih.gov/25439696/)
4. D'Agostino M, Bertamini L, Oliva S, Boccadoro M, Gay F. Pursuing a curative approach in multiple myeloma: a review of new therapeutic strategies. *Cancers (Basel).* 2019;11(12):2015. <https://doi.org/10.3390/cancers11122015> PMID: [31847174](https://pubmed.ncbi.nlm.nih.gov/31847174/)
5. Padala SA, Barsouk A, Barsouk A, Rawla P, Vakiti A, Kolhe R, et al. Epidemiology, staging, and management of multiple myeloma. *Med Sci (Basel).* 2021;9(1):3. <https://doi.org/10.3390/medsci9010003> PMID: [33498356](https://pubmed.ncbi.nlm.nih.gov/33498356/)
6. Chrischilles E, Schneider K, Wilwert J, Lessman G, O'Donnell B, Gryzlak B, et al. Beyond comorbidity: expanding the definition and measurement of complexity among older adults using administrative claims data. *Med Care.* 2014;52 Suppl 3:S75–84. <https://doi.org/10.1097/MLR.000000000000026> PMID: [24561763](https://pubmed.ncbi.nlm.nih.gov/24561763/)
7. Marengoni A, Angleman S, Melis R, Mangialasche F, Karp A, Garmen A, et al. Aging with multimorbidity: a systematic review of the literature. *Ageing Res Rev.* 2011;10(4):430–9. <https://doi.org/10.1016/j.arr.2011.03.003> PMID: [21402176](https://pubmed.ncbi.nlm.nih.gov/21402176/)
8. Gregersen H, Vangsted AJ, Abildgaard N, Andersen NF, Pedersen RS, Frølund UC, et al. The impact of comorbidity on mortality in multiple myeloma: a Danish nationwide population-based study. *Cancer Med.* 2017;6(7):1807–16. <https://doi.org/10.1002/cam4.1128> PMID: [28639741](https://pubmed.ncbi.nlm.nih.gov/28639741/)
9. Sverrisdóttir I, Rögnvaldsson S, Turesson I, Hultcrantz M, Björkholm M, Landgren CO. Multiple myeloma and comorbidity: a population-based study. *Clin Lymphoma Myeloma Leuk.* 2019;19(10, Supplement):e219.
10. Sverrisdóttir IS, Rögnvaldsson S, Thorsteinsdóttir S, Gíslason GK, Aspelund T, Turesson I, et al. Comorbidities in multiple myeloma and implications on survival: a population-based study. *Eur J Haematol.* 2021;106(6):774–82. <https://doi.org/10.1111/ejh.13597> PMID: [33565126](https://pubmed.ncbi.nlm.nih.gov/33565126/)
11. Zweegman S, Engelhardt M, Larocca A. Elderly patients with multiple myeloma: towards a frailty approach? *Curr Opin Oncol.* 2017;29(5):315–21. <https://doi.org/10.1097/CCO.0000000000000395>
12. Kim SH, Kim I, Koh Y, Shin D, Hong J, Seo KS. The importance of physical function in patients with multiple myeloma for improving quality of life. *Support Care Cancer.* 2020;28(5):2361–7. <https://doi.org/10.1007/s00520-019-05054-y> PMID: [31486982](https://pubmed.ncbi.nlm.nih.gov/31486982/)

13. Zweegman S, Palumbo A, Bringhen S, Sonneveld P. Age and aging in blood disorders: multiple myeloma. *Haematologica*. 2014;99(7):1133–7. <https://doi.org/10.3324/haematol.2014.110296>
14. Dhakal B, Giri S, Levin A, Rein L, Fenske TS, Chhabra S, et al. Factors associated with unplanned 30-day readmissions after hematopoietic cell transplantation among US hospitals. *JAMA Netw Open*. 2019;2(7):e196476. <https://doi.org/10.1001/jamanetworkopen.2019.6476> PMID: [31276175](https://pubmed.ncbi.nlm.nih.gov/31276175/)
15. Bennink MC, Stege CAM, Lissenberg-Witte BI, Oerlemans S, Seefat MR, Sonneveld P, et al. Impact of comorbidities on health-related quality of life in nontransplant eligible patients with newly diagnosed multiple myeloma. *Hemasphere*. 2022;6(7):e744. <https://doi.org/10.1097/HS9.0000000000000744> PMID: [35813097](https://pubmed.ncbi.nlm.nih.gov/35813097/)
16. Engelhardt M, Domm A-S, Dold SM, Ihorst G, Reinhardt H, Zober A, et al. A concise revised Myeloma Comorbidity Index as a valid prognostic instrument in a large cohort of 801 multiple myeloma patients. *Haematologica*. 2017;102(5):910–21. <https://doi.org/10.3324/haematol.2016.162693> PMID: [28154088](https://pubmed.ncbi.nlm.nih.gov/28154088/)
17. Kim SM, Kim MJ, Jung HA, Kim K, Kim SJ, Jang JH, et al. Comparison of the Freiburg and Charlson comorbidity indices in predicting overall survival in elderly patients with newly diagnosed multiple myeloma. *Biomed Res Int*. 2014;2014:437852. <https://doi.org/10.1155/2014/437852> PMID: [25114902](https://pubmed.ncbi.nlm.nih.gov/25114902/)
18. Wallace E, McDowell R, Bennett K, Fahey T, Smith SM. Comparison of count-based multimorbidity measures in predicting emergency admission and functional decline in older community-dwelling adults: a prospective cohort study. *BMJ Open*. 2016;6(9):e013089. <https://doi.org/10.1136/bmjopen-2016-013089> PMID: [27650770](https://pubmed.ncbi.nlm.nih.gov/27650770/)
19. Nardi R, Scanelli G, Corrao S, Iori I, Mathieu G, Cataldi Amatrian R. Co-morbidity does not reflect complexity in internal medicine patients. *Eur J Intern Med*. 2007;18(5):359–68. <https://doi.org/10.1016/j.ejim.2007.05.002> PMID: [17693224](https://pubmed.ncbi.nlm.nih.gov/17693224/)
20. Drosowsky A, Gough K. The Charlson Comorbidity Index: problems with use in epidemiological research. *J Clin Epidemiol*. 2022;148:174–7. <https://doi.org/10.1016/j.jclinepi.2022.03.022> PMID: [35395393](https://pubmed.ncbi.nlm.nih.gov/35395393/)
21. Fillmore NR, DuMontier C, Yildirim C, La J, Epstein MM, Cheng D, et al. Defining multimorbidity and its impact in older United States veterans newly treated for multiple myeloma. *J Natl Cancer Inst*. 2021;113(8):1084–93. <https://doi.org/10.1093/jnci/djab007> PMID: [33523236](https://pubmed.ncbi.nlm.nih.gov/33523236/)
22. Epstein MM, Zhou Y, Castaneda-Avila MA, Cohen HJ. Multimorbidity in patients with monoclonal gammopathy of undetermined significance. *Int J Cancer*. 2023;152(12):2485–92. <https://doi.org/10.1002/ijc.34476> PMID: [36799553](https://pubmed.ncbi.nlm.nih.gov/36799553/)
23. National Cancer Institute. Overview of the SEER Program. Available from: <https://seer.cancer.gov/about/overview.html>
24. Enewold L, Parsons H, Zhao L, Bott D, Rivera DR, Barrett MJ, et al. Updated overview of the SEER-medicare data: enhanced content and applications. *J Natl Cancer Inst Monogr*. 2020;2020(55):3–13. <https://doi.org/10.1093/jncimonographs/lgz029> PMID: [32412076](https://pubmed.ncbi.nlm.nih.gov/32412076/)
25. El-Nahal W. An overview of medicare for clinicians. *J Gen Intern Med*. 2020;35(12):3702–6. <https://doi.org/10.1007/s11606-019-05327-6> PMID: [32869198](https://pubmed.ncbi.nlm.nih.gov/32869198/)
26. National Cancer Institute. SEER-Medicare: How the SEER & Medicare Data are Linked. Available from: <https://healthcaredelivery.cancer.gov/seer-medicare/overview/linked.html>
27. Centers for Medicare and Medicaid Services. CMS Chronic Conditions Data Warehouse (CCW) Condition Algorithms and Change History. Available from: <https://www2.ccwdata.org/documents/10280/19139421/ccw-chronic-condition-algorithms.pdf>
28. Centers for Medicare and Medicaid Services. Chronic Conditions Warehouse Technical Guidance: Calculating Medicare Population Statistics. Available from: <https://www2.ccwdata.org/documents/10280/19002248/ccw-technical-guidance-calculating-medicare-population-statistics.pdf>
29. Álvarez-Gálvez J, Ortega-Martín E, Carretero-Bravo J, Pérez-Muñoz C, Suárez-Lledó V, Ramos-Fiol B. Social determinants of multimorbidity patterns: a systematic review. *Front Public Health*. 2023;11:1081518. <https://doi.org/10.3389/fpubh.2023.1081518> PMID: [37050950](https://pubmed.ncbi.nlm.nih.gov/37050950/)
30. Roso-Llorach A, Violán C, Foguet-Boreu Q, Rodríguez-Blanco T, Pons-Vigués M, Pujol-Ribera E, et al. Comparative analysis of methods for identifying multimorbidity patterns: a study of “real-world” data. *BMJ Open*. 2018;8(3):e018986. <https://doi.org/10.1136/bmjopen-2017-018986> PMID: [29572393](https://pubmed.ncbi.nlm.nih.gov/29572393/)
31. Everitt BS. Unresolved problems in cluster analysis. *Biometrics*. 1979;35(1):169. <https://doi.org/10.2307/2529943>
32. Newcomer SR, Steiner JF, Bayliss EA. Identifying subgroups of complex patients with cluster analysis. *Am J Manag Care*. 2011;17(8):e324–32. PMID: [21851140](https://pubmed.ncbi.nlm.nih.gov/21851140/)
33. Ward Jr JH. Hierarchical grouping to optimize an objective function. *J Am Stat Assoc*. 1963;58(301):236–44.
34. Charrad M, Ghazzali N, Boiteau V, Niknafs A. NbClust: An R Package for Determining the Relevant Number of Clusters in a Data Set. *J Stat Softw*. 2014;61(6):1–36.
35. Baré M, Herranz S, Roso-Llorach A, Jordana R, Violán C, Lleal M, et al. Multimorbidity patterns of chronic conditions and geriatric syndromes in older patients from the MoPIM multicentre cohort study. *BMJ Open*. 2021;11(11):e049334. <https://doi.org/10.1136/bmjopen-2021-049334> PMID: [34782339](https://pubmed.ncbi.nlm.nih.gov/34782339/)
36. Guisado-Clavero M, Roso-Llorach A, López-Jimenez T, Pons-Vigués M, Foguet-Boreu Q, Muñoz MA, et al. Multimorbidity patterns in the elderly: a prospective cohort study with cluster analysis. *BMC Geriatr*. 2018;18(1):16. <https://doi.org/10.1186/s12877-018-0705-7> PMID: [29338690](https://pubmed.ncbi.nlm.nih.gov/29338690/)
37. Marengoni A, Roso-Llorach A, Vetrano DL, Fernández-Bertolín S, Guisado-Clavero M, Violán C, et al. Patterns of multimorbidity in a population-based cohort of older people: Sociodemographic, lifestyle, clinical, and functional differences. *J Gerontol A Biol Sci Med Sci*. 2020;75(4):798–805. <https://doi.org/10.1093/gerona/glz137> PMID: [31125398](https://pubmed.ncbi.nlm.nih.gov/31125398/)

38. Sun J, Ono Y, Takeuchi Y. A Simple method for calculating the exact confidence interval of the standardized mortality ratio with an SAS function. *J Occup Health*. 1996;38(4):196–7. <https://doi.org/10.1539/joh.38.196>
39. Dimopoulos MA, Moreau P, Terpos E, Mateos MV, Zweegman S, Cook G, et al. Multiple myeloma: EHA-ESMO Clinical Practice Guidelines for diagnosis, treatment and follow-up. *Ann Oncol*. 2021;32(3):309–22. <https://doi.org/10.1016/j.annonc.2020.11.014> PMID: [33549387](https://pubmed.ncbi.nlm.nih.gov/33549387/)
40. Boquoi A, Rings V, Mohring A, Savickaite I, Zukovs R, Strapatsas J, et al. Opportunities for participation in randomized controlled trials for patients with multiple myeloma: trial access depends on restrictive eligibility criteria and patient expectations. *Cancers (Basel)*. 2022;14(9):2147. <https://doi.org/10.3390/cancers14092147> PMID: [35565276](https://pubmed.ncbi.nlm.nih.gov/35565276/)
41. Chakraborty R, Majhail NS. Treatment and disease-related complications in multiple myeloma: Implications for survivorship. *Am J Hematol*. 2020;95(6):672–90. <https://doi.org/10.1002/ajh.25764> PMID: [32086970](https://pubmed.ncbi.nlm.nih.gov/32086970/)
42. Prados-Torres A, Calderón-Larrañaga A, Hanco-Saavedra J, Poblador-Plou B, van den Akker M. Multimorbidity patterns: a systematic review. *J Clin Epidemiol*. 2014;67(3):254–66. <https://doi.org/10.1016/j.jclinepi.2013.09.021> PMID: [24472295](https://pubmed.ncbi.nlm.nih.gov/24472295/)
43. Asogwa OA, Quansah DY, Boakye D, Ezewuiro ON, Boateng D. Prevalence, patterns, and determinants of multimorbidity among childhood and adult cancer survivors: a systematic review. *Crit Rev Oncol Hematol*. 2023;192:104147. <https://doi.org/10.1016/j.critrevonc.2023.104147> PMID: [37778707](https://pubmed.ncbi.nlm.nih.gov/37778707/)
44. Whitson HE, Johnson KS, Sloane R, Cigolle CT, Pieper CF, Landerman L, et al. Identifying patterns of multimorbidity in older americans: application of latent class analysis. *J Am Geriatr Soc*. 2016;64(8):1668–73. <https://doi.org/10.1111/jgs.14201> PMID: [27309908](https://pubmed.ncbi.nlm.nih.gov/27309908/)
45. Ailawadhi S, Ma Q, Jalbert JJ, Zhou M, Zhou ZY, Downes N. Prevalence of ocular comorbidities in patients with multiple myeloma: an analysis of U.S. claims data. *J Clin Oncol*. 2022;40(16\_suppl):8038.
46. Brooks JM, Polenick CA, Bryson W, Naslund JA, Renn BN, Orzechowski NM, et al. Pain intensity, depressive symptoms, and functional limitations among older adults with serious mental illness. *Aging Ment Health*. 2019;23(4):470–4. <https://doi.org/10.1080/13607863.2017.1423025> PMID: [29356566](https://pubmed.ncbi.nlm.nih.gov/29356566/)
47. Tyrovolas S, Moneta V, Giné Vázquez I, Koyanagi A, Abduljabbar AS, Haro JM. Mental disorders, musculoskeletal disorders and income-driven patterns: evidence from the Global Burden of Disease Study 2017. *J Clin Med*. 2020;9(7):2189. <https://doi.org/10.3390/jcm9072189>
48. Hooten WM. Chronic pain and mental health disorders: shared neural mechanisms, epidemiology, and treatment. *Mayo Clin Proc*. 2016;91(7):955–70. <https://doi.org/10.1016/j.mayocp.2016.04.029> PMID: [27344405](https://pubmed.ncbi.nlm.nih.gov/27344405/)
49. Kiely KM, Brady B, Byles J. Gender, mental health and ageing. *Maturitas*. 2019;129:76–84. <https://doi.org/10.1016/j.maturitas.2019.09.004> PMID: [31547918](https://pubmed.ncbi.nlm.nih.gov/31547918/)
50. Briggs AM, Woolf AD, Dreinhöfer K, Homb N, Hoy DG, Kopansky-Giles D. Reducing the global burden of musculoskeletal conditions. *Bull World Health Organ*. 2018;96(5):366–8. <https://doi.org/10.2471/BLT.17.204891>
51. Moore KL, Boscardin WJ, Steinman MA, Schwartz JB. Patterns of chronic co-morbid medical conditions in older residents of U.S. nursing homes: differences between the sexes and across the agespan. *J Nutr Health Aging*. 2014;18(4):429–36. <https://doi.org/10.1007/s12603-014-0001-y> PMID: [24676326](https://pubmed.ncbi.nlm.nih.gov/24676326/)
52. Gorina Y, Kramarow EA. Identifying chronic conditions in Medicare claims data: evaluating the Chronic Condition Data Warehouse algorithm. *Health Serv Res*. 2011;46(5):1610–27. <https://doi.org/10.1111/j.1475-6773.2011.01277.x> PMID: [21649659](https://pubmed.ncbi.nlm.nih.gov/21649659/)
53. Ng SK, Tawiah R, Sawyer M, Scuffham P. Patterns of multimorbid health conditions: a systematic review of analytical methods and comparison analysis. *Int J Epidemiol*. 2018;47(5):1687–704. <https://doi.org/10.1093/ije/dyy134> PMID: [30016472](https://pubmed.ncbi.nlm.nih.gov/30016472/)
